# Supplementary material for: Boosting Mouse Defense against Lethal Toxoplasma gondii Infection with Full-Length and Soluble SAG1 Recombinant Protein
Source: MDPI journal article supplement (doi:10.3390/vaccines11111678), 2023-11-02
Supplement: s1 [file s1]

# Supplement materials

# Boosting Mouse Defense against Lethal *Toxoplasma gondii* Infection with Full-Length and Soluble SAG1 Recombinant Protein

Xiang Li <sup>1,2,†</sup>, Wei Yuan <sup>1,2,†</sup>, Ting He <sup>1,2</sup>, Ruiying Guo <sup>1,2</sup>, Xiuxian Du <sup>1,2</sup>, Yanhong He <sup>1,2</sup>, Xuan Li <sup>1,2</sup>, Saeed El-Ashram <sup>3</sup>, Ebtesam M. Al-Olayan <sup>4</sup>, Na Yang <sup>1,2,\*</sup> and Xiaoyu Sang <sup>1,2,\*</sup>

1 Key Laboratory of Livestock Infectious Diseases, Shenyang Agricultural University, Ministry of Education, Shenyang 110866, China; lx19980405@163.com (X.L.); yuanwei110923@163.com (W.Y.); 2021240709@stu.syau.edu.cn (T.H.); fruiming@stu.syau.edu.cn (R.G.); 2021220598@stu.syau.edu.cn (X.D.); 2022220595@stu.syau.edu.cn (Y.H.); 13081305895@163.com (X.L.)

2 College of Animal Science and Veterinary Medicine, Shenyang Agricultural University, Shenyang 110866, China

3 Zoology Department, Faculty of Science, Kafrelsheikh University, Kafr El-Sheikh 33516, Egypt; saeed\_elashram@yahoo.com

4 Department of Zoology, College of Science, King Saud University, Riyadh 11451, Saudi Arabia; eolayan@ksu.edu.sa

\* Correspondence: dayangna@syau.edu.cn (N.Y.); xysang2016@syau.edu.cn (X.S.)

† These authors contributed equally to this work.

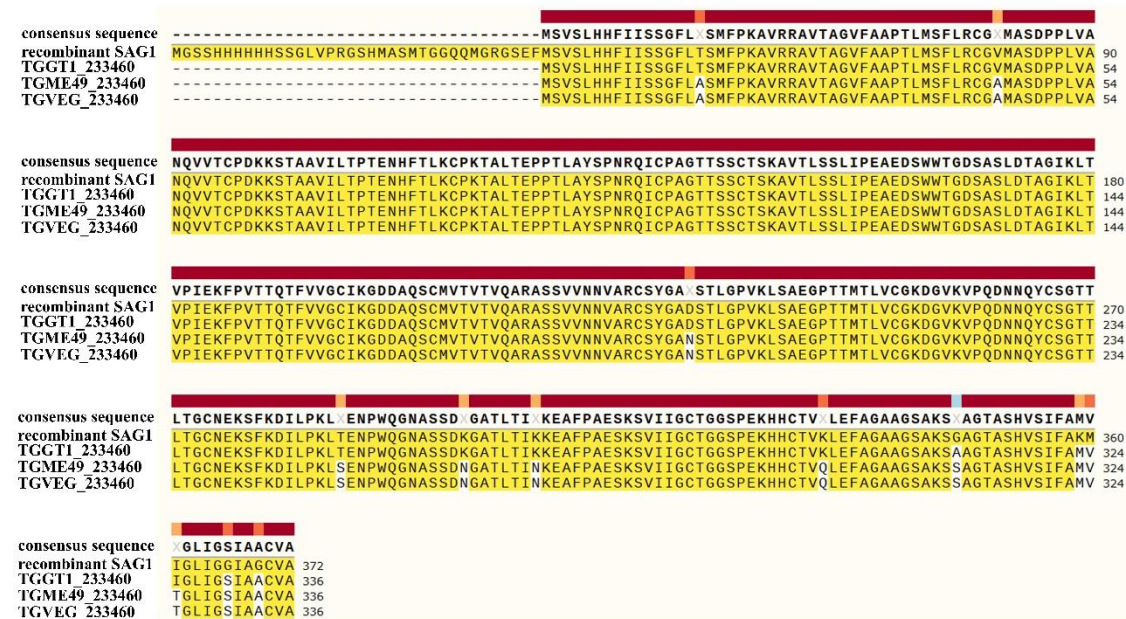

**Figure S1.** Sequence alignment between recombinant SAG1 protein and native SAG1 proteins of *T. gondii* types I and II strains. The amino acid sequence of the recombinant SAG1 was translated from the pET-28a-SAG1 sequence. The amino acid sequences of three native SAG1 were loaded from ToxoDB data.

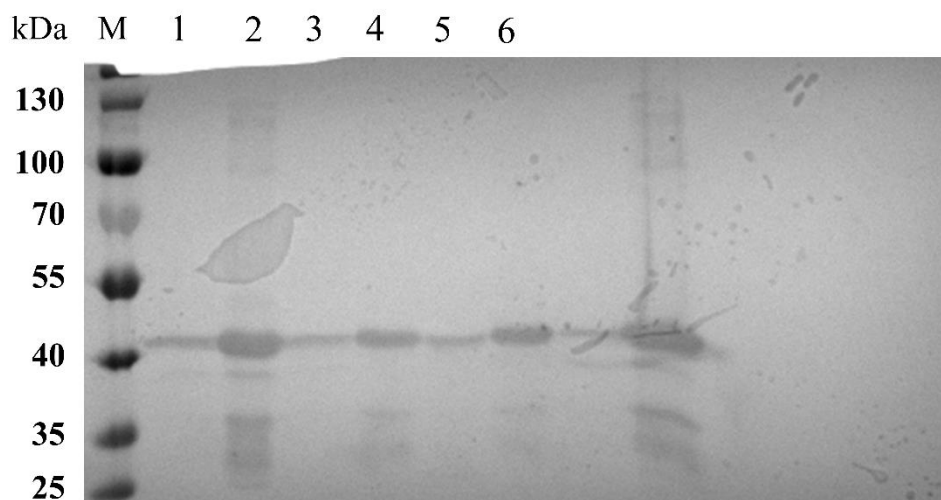

**Figure S2.** The whole images of Figure 1 B. Identification of SAG1 recombinant protein expressed in *E. coli* Transetta (DE3) cells by western blot. 1,3,5: The soluble protein of interest in the cell lysates supernatant from three randomly selected single colonies ; 2,4,6: The insoluble protein of interest in cell lysate precipitation from three randomly selected single colonies; M: Stander protein marker.

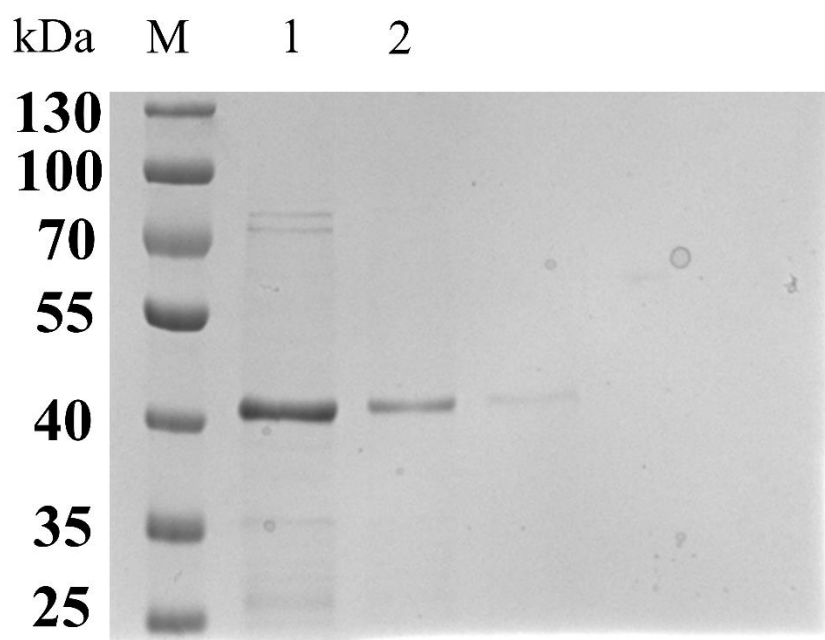

**Figure S3.** The whole images of Figure 1 D. (D) Purified SAG1 recombinant protein identified by SDS-PAGE. 1,2: Target protein was in eluent buffer; M: Stander protein marker.

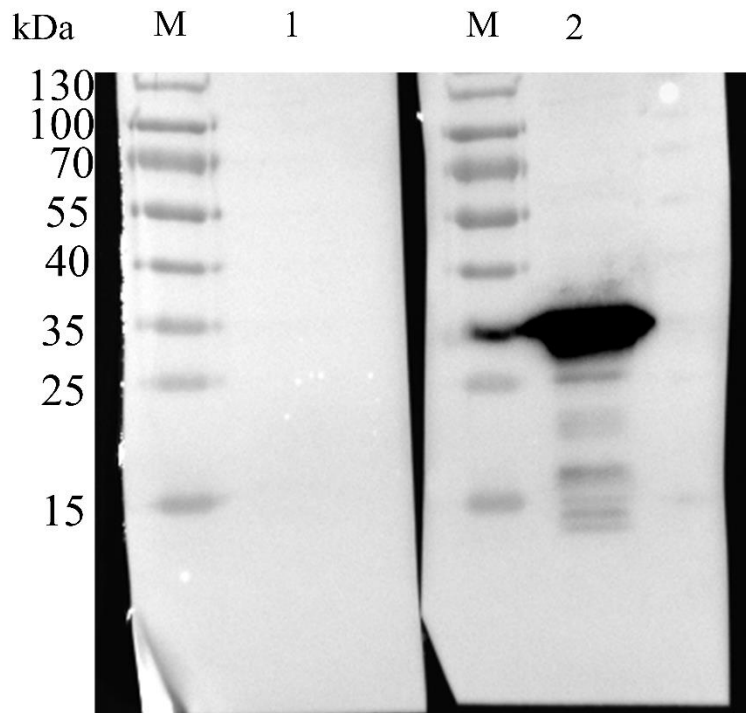

**Figure S4.** The whole images of Figure 2A. Western blot analysis for native SAG1 in TLA with the experimental mouse sera. 1: The reaction of TLA with the sera isolated from mice in the control group; 2: The reaction of TLA with the sera isolated from mice in the immunize group; M: Stander protein marker.

**Table S1.** Peptides with high score at C terminal of SAG1 protein binding to MHC class II molecules predicted by IEDB<sup>a</sup>.

| Allele <sup>b</sup> | Start      | End        | Peptide <sup>c</sup>   | Score <sup>d</sup> |
|---------------------|------------|------------|------------------------|--------------------|
| H2-IAAd             | 175        | 189        | TVQARASSVNNVAR         | 0.519              |
| <b>H2-IAAd</b>      | <b>308</b> | <b>322</b> | <b>AKSAAGTASHVSIFA</b> | <b>0.4901</b>      |
| H2-IAAd             | 171        | 185        | MVTVTVQARASSVNN        | 0.4661             |
| H2-IAAd             | 296        | 310        | TVKLEFAGAAGSAKS        | 0.4398             |
| H2-IAAd             | 169        | 183        | SCMVTVTVQARASSV        | 0.4304             |
| H2-IAAd             | 170        | 184        | CMVTVTVQARASSVV        | 0.4233             |
| <b>H2-IAAd</b>      | <b>307</b> | <b>321</b> | <b>SAKSAAGTASHVSIF</b> | <b>0.4184</b>      |
| H2-IAAd             | 174        | 188        | VTQARASSVNNVA          | 0.4077             |
| H2-IAAd             | 113        | 127        | KAVTLSSLIPEAEDS        | 0.3972             |
| <b>H2-IAAd</b>      | <b>302</b> | <b>316</b> | <b>AGAAGSAKSAAGTAS</b> | <b>0.3781</b>      |
| H2-IAAd             | 240        | 254        | EKSFKDILPKLTENP        | 0.3711             |
| H2-IAAd             | 168        | 182        | QSCMVTVTVQARASS        | 0.3714             |
| <b>H2-IAAd</b>      | <b>295</b> | <b>309</b> | <b>CTVKLEFAGAAGSAK</b> | <b>0.3736</b>      |

|               |            |            |                        |               |
|---------------|------------|------------|------------------------|---------------|
| <b>H2-IAd</b> | <b>306</b> | <b>320</b> | <b>GSAKSAAGTASHVSI</b> | <b>0.3635</b> |
| H2-IAd        | 297        | 311        | VKLEFAGAAGSAKSA        | 0.3525        |
| H2-IAd        | 63         | 77         | KKSTAAVILTPTEH         | 0.3298        |
| H2-IAd        | 61         | 75         | PDKKSTAAVILTPTE        | 0.3298        |
| <b>H2-IAd</b> | <b>301</b> | <b>315</b> | <b>FAGAAGSAKSAAGTA</b> | <b>0.3227</b> |
| H2-IAd        | 25         | 39         | RAVTAGVFAAPTLMS        | 0.3234        |
| H2-IAd        | 62         | 76         | DKKSTAAVILTPTEN        | 0.3172        |

<sup>a</sup>The Immune Epitope Database (<http://tools.immuneepitope.org/mhcii>);

<sup>b</sup> H2-IAd alleles (mouse MHC class II molecules);

<sup>c</sup> 15 amino acids were chosen for analysis;

<sup>d</sup> High score indicates high level binding.
